# Supplementary material for: Identification of relevant drugable targets in diffuse large B-cell lymphoma using a genome-wide unbiased CD20 guilt-by association approach
Source: PLoS One. 2018 Feb 28;13(2):e0193098. doi: 10.1371/journal.pone.0193098 (PMC5831110; doi:10.1371/journal.pone.0193098)
Supplement: S2 Table — Shown are the first 500 MS4A1-associated gene probes with corresponding gene symbol, gene title and chromosomal location by Pearson’s correlation with confidence interfals (CI). (XLSX) [file pone.0193098.s002.xlsx]

## Sheet: S2 Table
probe	Gene Symbol	Gene Title	Chromosomal Location	Pearson's Correlation	Lower 95% CI R	Upper 95% CI R	Z	Sig. (2-tailed)	MVP reject H0 (FDR 1%, CI 99%, nPerm 1000)
209307_at	SWAP70	SWAP switching B-cell complex 70kDa subunit	chr11p15	0.551814	0.51831	0.583627	25.9183	4.14735e-148	true
209306_s_at	SWAP70	SWAP switching B-cell complex 70kDa subunit	chr11p15	0.54452	0.510643	0.576709	25.4831	3.03845e-143	true
221969_at	PAX5	paired box 5	chr9p13	0.537785	0.503568	0.570318	25.0856	7.15044e-139	true
219497_s_at	BCL11A	B-cell CLL/lymphoma 11A (zinc finger protein)	chr2p16.1	0.525854	0.491046	0.558986	24.3912	2.12274e-131	true
219498_s_at	BCL11A	B-cell CLL/lymphoma 11A (zinc finger protein)	chr2p16.1	0.519927	0.484831	0.553352	24.0507	8.21425e-128	true
205049_s_at	CD79A	CD79a molecule, immunoglobulin-associated alpha	chr19q13.2	0.483978	0.44721	0.519114	22.0442	1.08498e-107	true
201259_s_at	SYPL1	synaptophysin-like 1	chr7q22.3	0.4832	0.446396	0.518371	22.0018	2.76645e-107	true
216899_s_at	SKAP2	src kinase associated phosphoprotein 2	chr7p15.2	0.468716	0.431277	0.504544	21.2202	6.21398e-100	true
205801_s_at	RASGRP3	RAS guanyl releasing protein 3 (calcium and DAG-regulated)	chr2p25.1-p24.1	0.445252	0.406827	0.482104	19.9822	7.86414e-89	true
217422_s_at	CD22	CD22 molecule	chr19q13.1	0.440218	0.401589	0.477284	19.7209	1.42601e-86	true
218236_s_at	PRKD3	protein kinase D3	chr2p21	0.435717	0.396907	0.472972	19.4885	1.37572e-84	true
204581_at	CD22	CD22 molecule	chr19q13.1	0.432738	0.39381	0.470117	19.3353	2.71346e-83	true
221781_s_at	DNAJC10	DnaJ (Hsp40) homolog, subfamily C, member 10	chr2q32.1	0.426619	0.38745	0.46425	19.022	1.12109e-80	true
219518_s_at	ELL3	elongation factor RNA polymerase II-like 3	chr15q15.3	0.426564	0.387393	0.464197	19.0192	1.18254e-80	true
218640_s_at	PLEKHF2	pleckstrin homology domain containing, family F (with FYVE domain) member 2	chr8q22.1	0.425012	0.385781	0.462709	18.9401	5.3305e-80	true
210347_s_at	BCL11A	B-cell CLL/lymphoma 11A (zinc finger protein)	chr2p16.1	0.424159	0.384895	0.461891	18.8967	1.21461e-79	true
38521_at	CD22	CD22 molecule	chr19q13.1	0.421969	0.382621	0.45979	18.7853	9.95285e-79	true
204361_s_at	SKAP2	src kinase associated phosphoprotein 2	chr7p15.2	0.421901	0.382549	0.459724	18.7819	1.06299e-78	true
208456_s_at	RRAS2	related RAS viral (r-ras) oncogene homolog 2	chr11p15.2	0.418405	0.378919	0.45637	18.6047	2.94539e-77	true
216250_s_at	LPXN	leupaxin	chr11q12.1	0.414136	0.374489	0.452272	18.3892	1.60394e-75	true
202374_s_at	AURKAPS1 /// RAB3GAP2	aurora kinase A pseudogene 1 /// RAB3 GTPase activating protein subunit 2 (non-catalytic)	chr1q41	0.404667	0.364666	0.443176	17.9143	9.11305e-72	true
204674_at	LRMP	lymphoid-restricted membrane protein	chr12p12.1	0.40331	0.363259	0.441872	17.8467	3.06859e-71	true
211352_s_at	NCOA3	nuclear receptor coactivator 3	chr20q12	0.402754	0.362684	0.441338	17.819	5.03438e-71	true
204192_at	CD37	CD37 molecule	chr19q13.3	0.399522	0.359333	0.438231	17.6582	8.79994e-70	true
201260_s_at	SYPL1	synaptophysin-like 1	chr7q22.3	0.397789	0.357537	0.436565	17.5722	4.02328e-69	true
205297_s_at	CD79B	CD79b molecule, immunoglobulin-associated beta	chr17q23	0.397762	0.35751	0.436539	17.5709	4.11721e-69	true
35974_at	LRMP	lymphoid-restricted membrane protein	chr12p12.1	0.396879	0.356595	0.43569	17.5271	8.89973e-69	true
209580_s_at	MBD4	methyl-CpG binding domain protein 4	chr3q21.3	0.396556	0.35626	0.435379	17.5111	1.17884e-68	true
215711_s_at	WEE1	WEE1 homolog (S. pombe)	chr11p15.3-p15.1	0.396435	0.356135	0.435263	17.5051	1.3094e-68	true
203185_at	RASSF2	Ras association (RalGDS/AF-6) domain family member 2	chr20p13	0.396416	0.356115	0.435245	17.5042	1.33153e-68	true
201299_s_at	MOB1A	MOB kinase activator 1A	chr2p13.1	0.395275	0.354933	0.434147	17.4477	3.58324e-68	true
200008_s_at	GDI2	GDP dissociation inhibitor 2	chr10p15	0.391865	0.351401	0.430867	17.2793	6.73832e-67	true
206206_at	CD180	CD180 molecule	chr5q12	0.39162	0.351148	0.430631	17.2672	8.30598e-67	true
206398_s_at	CD19	CD19 molecule	chr16p11.2	0.390874	0.350376	0.429914	17.2305	1.56904e-66	true
201720_s_at	LAPTM5	lysosomal protein transmembrane 5	chr1p34	0.389626	0.349084	0.428713	17.169	4.52971e-66	true
214190_x_at	GGA2	golgi-associated, gamma adaptin ear containing, ARF binding protein 2	chr16p12	0.389319	0.348766	0.428418	17.1539	5.87542e-66	true
208621_s_at	EZR	ezrin	chr6q25.3	0.389316	0.348762	0.428414	17.1537	5.89306e-66	true
210658_s_at	GGA2	golgi-associated, gamma adaptin ear containing, ARF binding protein 2	chr16p12	0.387919	0.347316	0.42707	17.0851	1.9168e-65	true
213548_s_at	CDV3	CDV3 homolog (mouse)	chr3q22.1	0.387407	0.346786	0.426578	17.0599	2.94872e-65	true
211559_s_at	CCNG2	cyclin G2	chr4q21.1	0.38731	0.346686	0.426484	17.0552	3.19961e-65	true
219517_at	ELL3	elongation factor RNA polymerase II-like 3	chr15q15.3	0.387157	0.346528	0.426337	17.0477	3.63734e-65	true
206860_s_at	MIOS	missing oocyte, meiosis regulator, homolog (Drosophila)	chr7p21.3	0.386123	0.345457	0.425342	16.9969	8.65533e-65	true
217234_s_at	EZR	ezrin	chr6q25.3	0.384491	0.343768	0.42377	16.9169	3.37735e-64	true
204215_at	TMEM243	transmembrane protein 243, mitochondrial	chr7q21.12	0.382559	0.341769	0.42191	16.8224	1.67287e-63	true
212590_at	RRAS2	related RAS viral (r-ras) oncogene homolog 2	chr11p15.2	0.381985	0.341176	0.421358	16.7943	2.68546e-63	true
204362_at	SKAP2	src kinase associated phosphoprotein 2	chr7p15.2	0.379652	0.338762	0.419111	16.6804	1.81911e-62	true
220059_at	STAP1	signal transducing adaptor family member 1	chr4q13.2	0.379495	0.3386	0.418959	16.6728	2.0677e-62	true
205153_s_at	CD40	CD40 molecule, TNF receptor superfamily member 5	chr20q12-q13.2	0.378207	0.337268	0.417719	16.61	5.89788e-62	true
221586_s_at	E2F5	E2F transcription factor 5, p130-binding	chr8q21.2	0.377735	0.33678	0.417264	16.587	8.64993e-62	true
217811_at	SELT	selenoprotein T	chr3q25.1	0.375555	0.334525	0.415164	16.481	5.02475e-61	true
204057_at	IRF8	interferon regulatory factor 8	chr16q24.1	0.375187	0.334145	0.414809	16.4631	6.75477e-61	true
204312_x_at	CREB1	cAMP responsive element binding protein 1	chr2q34	0.374496	0.33343	0.414143	16.4295	1.17531e-60	true
208679_s_at	ARPC2	actin related protein 2/3 complex, subunit 2, 34kDa	chr2q36.1	0.374373	0.333303	0.414025	16.4236	1.29672e-60	true
201298_s_at	MOB1A	MOB kinase activator 1A	chr2p13.1	0.373749	0.332658	0.413424	16.3933	2.13456e-60	true
202391_at	BASP1	brain abundant, membrane attached signal protein 1	chr5p15.1	0.373578	0.332482	0.413259	16.385	2.4464e-60	true
206036_s_at	REL	v-rel reticuloendotheliosis viral oncogene homolog (avian)	chr2p13-p12	0.373387	0.332284	0.413074	16.3757	2.85002e-60	true
208915_s_at	GGA2	golgi-associated, gamma adaptin ear containing, ARF binding protein 2	chr16p12	0.373093	0.33198	0.412791	16.3615	3.60114e-60	true
204761_at	USP6NL	USP6 N-terminal like	chr10p13	0.37291	0.33179	0.412614	16.3526	4.16838e-60	true
200727_s_at	ACTR2	ARP2 actin-related protein 2 homolog (yeast)	chr2p14	0.372822	0.3317	0.41253	16.3484	4.46801e-60	true
204951_at	RHOH	ras homolog family member H	chr4p13	0.372167	0.331023	0.411899	16.3166	7.52055e-60	true
209281_s_at	ATP2B1	ATPase, Ca++ transporting, plasma membrane 1	chr12q21.3	0.371744	0.330586	0.411491	16.2961	1.05149e-59	true
209269_s_at	SYK	spleen tyrosine kinase	chr9q22	0.370037	0.328822	0.409846	16.2135	4.04715e-59	true
203537_at	PRPSAP2	phosphoribosyl pyrophosphate synthetase-associated protein 2	chr17p11.2-p12	0.369587	0.328357	0.409412	16.1918	5.76541e-59	true
200729_s_at	ACTR2	ARP2 actin-related protein 2 homolog (yeast)	chr2p14	0.369539	0.328307	0.409365	16.1894	5.98876e-59	true
209060_x_at	NCOA3	nuclear receptor coactivator 3	chr20q12	0.368721	0.327462	0.408577	16.1499	1.137e-58	true
201297_s_at	MOB1A	MOB kinase activator 1A	chr2p13.1	0.368093	0.326813	0.407971	16.1196	1.85847e-58	true
204661_at	CD52	CD52 molecule	chr1p36	0.367606	0.32631	0.407502	16.0961	2.71742e-58	true
221581_s_at	LAT2	linker for activation of T cells family, member 2	chr7q11.23	0.366886	0.325566	0.406808	16.0613	4.76118e-58	true
221268_s_at	SGPP1	sphingosine-1-phosphate phosphatase 1	chr14q23.2	0.366834	0.325512	0.406757	16.0588	4.95799e-58	true
201371_s_at	CUL3	cullin 3	chr2q36.2	0.366495	0.325162	0.406431	16.0425	6.45127e-58	true
203241_at	UVRAG	UV radiation resistance associated	chr11q13.5	0.366018	0.324669	0.40597	16.0195	9.34388e-58	true
205267_at	POU2AF1	POU class 2 associating factor 1	chr11q23.1	0.365931	0.324579	0.405886	16.0153	9.99297e-58	true
207968_s_at	MEF2C	myocyte enhancer factor 2C	chr5q14	0.363383	0.321947	0.403428	15.8926	7.12896e-57	true
220147_s_at	FAM60A	family with sequence similarity 60, member A	chr12p11	0.363301	0.321863	0.40335	15.8887	7.58981e-57	true
203416_at	CD53	CD53 molecule	chr1p13	0.363011	0.321564	0.40307	15.8748	9.47746e-57	true
209862_s_at	CEP57	centrosomal protein 57kDa	chr11q21	0.362737	0.32128	0.402805	15.8616	1.16939e-56	true
208517_x_at	BTF3	basic transcription factor 3	chr5q13.2	0.362636	0.321176	0.402708	15.8567	1.26331e-56	true
212631_at	STX7	syntaxin 7	chr6q23.1	0.362446	0.32098	0.402525	15.8476	1.46042e-56	true
212533_at	WEE1	WEE1 homolog (S. pombe)	chr11p15.3-p15.1	0.360969	0.319455	0.4011	15.7767	4.50162e-56	true
208885_at	LCP1	lymphocyte cytosolic protein 1 (L-plastin)	chr13q14.3	0.359765	0.318212	0.399938	15.7189	1.12245e-55	true
202373_s_at	AURKAPS1 /// RAB3GAP2	aurora kinase A pseudogene 1 /// RAB3 GTPase activating protein subunit 2 (non-catalytic)	chr1q41	0.35918	0.317608	0.399373	15.6909	1.74658e-55	true
202732_at	PKIG	protein kinase (cAMP-dependent, catalytic) inhibitor gamma	chr20q12-q13.1	0.358695	0.317107	0.398906	15.6676	2.51743e-55	true
220588_at	BCAS4	breast carcinoma amplified sequence 4	chr20q13.13	0.357674	0.316054	0.397921	15.6188	5.42365e-55	true
206513_at	AIM2	absent in melanoma 2	chr1q22	0.357322	0.31569	0.397581	15.6019	7.06332e-55	true
201523_x_at	UBE2N	ubiquitin-conjugating enzyme E2N	chr12q22	0.356043	0.31437	0.396346	15.5408	1.83797e-54	true
202113_s_at	SNX2	sorting nexin 2	chr5q23	0.354866	0.313156	0.39521	15.4845	4.41247e-54	true
207904_s_at	LNPEP	leucyl/cystinyl aminopeptidase	chr5q15	0.353673	0.311925	0.394059	15.4276	1.06766e-53	true
203457_at	STX7	syntaxin 7	chr6q23.1	0.352871	0.311097	0.393284	15.3893	1.92994e-53	true
211016_x_at	HSPA4	heat shock 70kDa protein 4	chr5q31.1	0.352161	0.310364	0.392598	15.3555	3.25476e-53	true
221782_at	DNAJC10	DnaJ (Hsp40) homolog, subfamily C, member 10	chr2q32.1	0.352055	0.310255	0.392496	15.3504	3.51823e-53	true
214812_s_at	MOB1A	MOB kinase activator 1A	chr2p13.1	0.351812	0.310005	0.392262	15.3389	4.20333e-53	true
212065_s_at	USP34	ubiquitin specific peptidase 34	chr2p15	0.35159	0.309776	0.392047	15.3283	4.9465e-53	true
200081_s_at	RPS6	ribosomal protein S6	chr9p21	0.351509	0.309692	0.391969	15.3244	5.25074e-53	true
211084_x_at	PRKD3	protein kinase D3	chr2p21	0.351277	0.309452	0.391744	15.3134	6.22463e-53	true
207655_s_at	BLNK	B-cell linker	chr10q23.2-q23.33	0.351092	0.309262	0.391566	15.3046	7.12666e-53	true
204613_at	PLCG2	phospholipase C, gamma 2 (phosphatidylinositol-specific)	chr16q24.1	0.350981	0.309147	0.391458	15.2993	7.73011e-53	true
203492_x_at	CEP57	centrosomal protein 57kDa	chr11q21	0.349881	0.308013	0.390396	15.2469	1.72516e-52	true
202996_at	POLD4	polymerase (DNA-directed), delta 4, accessory subunit	chr11q13	0.349795	0.307924	0.390313	15.2429	1.83642e-52	true
207700_s_at	NCOA3	nuclear receptor coactivator 3	chr20q12	0.349751	0.307879	0.390271	15.2408	1.89571e-52	true
214513_s_at	CREB1	cAMP responsive element binding protein 1	chr2q34	0.348195	0.306274	0.388768	15.1668	5.86265e-52	true
215933_s_at	HHEX	hematopoietically expressed homeobox	chr10q23.33	0.347958	0.306029	0.388539	15.1556	6.96167e-52	true
209199_s_at	MEF2C	myocyte enhancer factor 2C	chr5q14	0.347899	0.305969	0.388482	15.1528	7.26307e-52	true
210754_s_at	LYN	v-yes-1 Yamaguchi sarcoma viral related oncogene homolog	chr8q13	0.346506	0.304533	0.387137	15.0867	1.98169e-51	true
205861_at	SPIB	Spi-B transcription factor (Spi-1/PU.1 related)	chr19q13.3-q13.4	0.346408	0.304431	0.387041	15.082	2.12685e-51	true
200036_s_at	RPL10A	ribosomal protein L10a	chr6p21.31	0.346042	0.304054	0.386688	15.0647	2.76592e-51	true
207540_s_at	SYK	spleen tyrosine kinase	chr9q22	0.346007	0.304018	0.386654	15.063	2.83599e-51	true
207124_s_at	GNB5	guanine nucleotide binding protein (G protein), beta 5	chr15q21.2	0.345596	0.303595	0.386257	15.0435	3.80693e-51	true
201345_s_at	UBE2D2	ubiquitin-conjugating enzyme E2D 2	chr5q31.2	0.345316	0.303306	0.385987	15.0303	4.65148e-51	true
34210_at	CD52	CD52 molecule	chr1p36	0.343792	0.301734	0.384514	14.9581	1.37987e-50	true
210892_s_at	GTF2I	general transcription factor IIi	chr7q11.23	0.342245	0.30014	0.383019	14.8849	4.13167e-50	true
202213_s_at	CUL4B	cullin 4B	chrXq23	0.341793	0.299674	0.382582	14.8635	5.68574e-50	true
208652_at	PPP2CA	protein phosphatase 2, catalytic subunit, alpha isozyme	chr5q31.1	0.341791	0.299672	0.38258	14.8634	5.69382e-50	true
209760_at	KIAA0922	KIAA0922	chr4q31.3	0.341747	0.299627	0.382538	14.8614	5.87112e-50	true
202693_s_at	STK17A	serine/threonine kinase 17a	chr7p13	0.340034	0.297862	0.380882	14.7805	1.95774e-49	true
201079_at	SYNGR2	synaptogyrin 2	chr17q25.3	0.339905	0.297729	0.380757	14.7744	2.14283e-49	true
217301_x_at	RBBP4	retinoblastoma binding protein 4	chr1p35.1	0.339567	0.29738	0.38043	14.7584	2.71565e-49	true
211724_x_at	MIOS	missing oocyte, meiosis regulator, homolog (Drosophila)	chr7p21.3	0.338684	0.296471	0.379577	14.7168	5.02988e-49	true
200624_s_at	MATR3 /// SNHG4	matrin 3 /// small nucleolar RNA host gene 4 (non-protein coding)	chr5q31.2	0.337709	0.295466	0.378634	14.6708	9.91381e-49	true
213376_at	ZBTB1	zinc finger and BTB domain containing 1	chr14q23.3	0.33754	0.295292	0.37847	14.6629	1.11481e-48	true
204249_s_at	LMO2	LIM domain only 2 (rhombotin-like 1)	chr11p13	0.337194	0.294935	0.378136	14.6466	1.41712e-48	true
219679_s_at	WAC	WW domain containing adaptor with coiled-coil	chr10p12.1|10p12.1-p11.2	0.336354	0.294071	0.377324	14.607	2.53292e-48	true
200996_at	ACTR3	ARP3 actin-related protein 3 homolog (yeast)	chr2q14.1	0.336343	0.294059	0.377313	14.6065	2.55189e-48	true
216684_s_at	SS18	synovial sarcoma translocation, chromosome 18	chr18q11.2	0.336161	0.293872	0.377137	14.5979	2.89419e-48	true
219551_at	EAF2	ELL associated factor 2	chr3q13.33	0.335992	0.293697	0.376973	14.59	3.2529e-48	true
212646_at	RFTN1	raftlin, lipid raft linker 1	chr3p24.3	0.335414	0.293102	0.376414	14.5628	4.84406e-48	true
202770_s_at	CCNG2	cyclin G2	chr4q21.1	0.335147	0.292827	0.376156	14.5502	5.82049e-48	true
210257_x_at	CUL4B	cullin 4B	chrXq23	0.33497	0.292645	0.375986	14.542	6.56908e-48	true
200641_s_at	YWHAZ	tyrosine 3-monooxygenase/tryptophan 5-monooxygenase activation protein, zeta polypeptide	chr8q23.1	0.334685	0.292351	0.375709	14.5285	7.99311e-48	true
209027_s_at	ABI1	abl-interactor 1	chr10p11.2	0.332545	0.290148	0.373639	14.428	3.44791e-47	true
203331_s_at	INPP5D	inositol polyphosphate-5-phosphatase, 145kDa	chr2q37.1	0.332269	0.289864	0.373373	14.4151	4.15887e-47	true
204005_s_at	PAWR	PRKC, apoptosis, WT1, regulator	chr12q21	0.332163	0.289754	0.37327	14.4101	4.4701e-47	true
200607_s_at	RAD21	RAD21 homolog (S. pombe)	chr8q24	0.331785	0.289365	0.372904	14.3924	5.77894e-47	true
209200_at	MEF2C	myocyte enhancer factor 2C	chr5q14	0.33161	0.289185	0.372735	14.3842	6.50319e-47	true
201023_at	TAF7	TAF7 RNA polymerase II, TATA box binding protein (TBP)-associated factor, 55kDa	chr5q31	0.331602	0.289176	0.372727	14.3838	6.54243e-47	true
211450_s_at	MSH6	mutS homolog 6 (E. coli)	chr2p16	0.331243	0.288807	0.37238	14.367	8.34096e-47	true
205504_at	BTK	Bruton agammaglobulinemia tyrosine kinase	chrXq21.33-q22	0.330328	0.287865	0.371495	14.3241	1.54741e-46	true
202816_s_at	SS18	synovial sarcoma translocation, chromosome 18	chr18q11.2	0.329481	0.286993	0.370675	14.2844	2.73683e-46	true
210538_s_at	BIRC3	baculoviral IAP repeat containing 3	chr11q22	0.329327	0.286835	0.370526	14.2772	3.0347e-46	true
200723_s_at	CAPRIN1	cell cycle associated protein 1	chr11p13	0.329269	0.286775	0.37047	14.2745	3.1563e-46	true
201311_s_at	SH3BGRL	SH3 domain binding glutamic acid-rich protein like	chrXq13.3	0.327924	0.285391	0.369168	14.2116	7.76782e-46	true
214971_s_at	ST6GAL1	ST6 beta-galactosamide alpha-2,6-sialyltranferase 1	chr3q27-q28	0.326943	0.284381	0.368219	14.1657	1.49335e-45	true
202372_at	AURKAPS1 /// RAB3GAP2	aurora kinase A pseudogene 1 /// RAB3 GTPase activating protein subunit 2 (non-catalytic)	chr1q41	0.326554	0.28398	0.367842	14.1475	1.93521e-45	true
206530_at	RAB30	RAB30, member RAS oncogene family	chr11q12-q14	0.326552	0.283978	0.36784	14.1474	1.93722e-45	true
201524_x_at	UBE2N	ubiquitin-conjugating enzyme E2N	chr12q22	0.325743	0.283146	0.367058	14.1096	3.31223e-45	true
205541_s_at	GSPT2	G1 to S phase transition 2	chrXp11.22	0.325704	0.283106	0.36702	14.1078	3.39919e-45	true
213982_s_at	RABGAP1L	RAB GTPase activating protein 1-like	chr1q24	0.325677	0.283078	0.366993	14.1065	3.46111e-45	true
200828_s_at	ZNF207	zinc finger protein 207	chr17q11.2	0.325329	0.28272	0.366657	14.0903	4.35497e-45	true
209131_s_at	SNAP23	synaptosomal-associated protein, 23kDa	chr15q14	0.324859	0.282236	0.366202	14.0684	5.94238e-45	true
201476_s_at	RRM1	ribonucleotide reductase M1	chr11p15.5	0.323937	0.281287	0.365309	14.0254	1.09071e-44	true
208447_s_at	PRPS1	phosphoribosyl pyrophosphate synthetase 1	chrXq22.3	0.323853	0.281201	0.365228	14.0215	1.15217e-44	true
204313_s_at	CREB1	cAMP responsive element binding protein 1	chr2q34	0.32291	0.280231	0.364315	13.9775	2.13898e-44	true
201686_x_at	API5	apoptosis inhibitor 5	chr11p11.2	0.322356	0.279661	0.363779	13.9517	3.07204e-44	true
211939_x_at	BTF3	basic transcription factor 3	chr5q13.2	0.322265	0.279568	0.36369	13.9475	3.2604e-44	true
214047_s_at	MBD4	methyl-CpG binding domain protein 4	chr3q21.3	0.321315	0.278591	0.362771	13.9032	6.05463e-44	true
209421_at	MSH2	mutS homolog 2, colon cancer, nonpolyposis type 1 (E. coli)	chr2p21	0.321098	0.278368	0.36256	13.8931	6.97156e-44	true
212589_at	RRAS2	related RAS viral (r-ras) oncogene homolog 2	chr11p15.2	0.321037	0.278304	0.362501	13.8903	7.25686e-44	true
216392_s_at	SEC23IP	SEC23 interacting protein	chr10q25-q26	0.320991	0.278258	0.362457	13.8882	7.4728e-44	true
215346_at	CD40	CD40 molecule, TNF receptor superfamily member 5	chr20q12-q13.2	0.320922	0.278186	0.36239	13.8849	7.81699e-44	true
203345_s_at	MTF2	metal response element binding transcription factor 2	chr1p22.1	0.320843	0.278105	0.362313	13.8812	8.23064e-44	true
210786_s_at	FLI1	Friend leukemia virus integration 1	chr11q24.1-q24.3	0.320724	0.277982	0.362198	13.8757	8.89202e-44	true
215997_s_at	CUL4B	cullin 4B	chrXq23	0.320683	0.277941	0.362159	13.8738	9.12762e-44	true
212311_at	SEL1L3	sel-1 suppressor of lin-12-like 3 (C. elegans)	chr4p15.2	0.320584	0.277839	0.362063	13.8692	9.73223e-44	true
216241_s_at	TCEA1	transcription elongation factor A (SII), 1	chr8q11.2	0.319927	0.277163	0.361426	13.8386	1.48982e-43	true
213554_s_at	CDV3	CDV3 homolog (mouse)	chr3q22.1	0.319618	0.276845	0.361127	13.8243	1.81866e-43	true
212632_at	STX7	syntaxin 7	chr6q23.1	0.319549	0.276774	0.36106	13.8211	1.90174e-43	true
207238_s_at	PTPRC	protein tyrosine phosphatase, receptor type, C	chr1q31-q32	0.318816	0.27602	0.36035	13.787	3.051e-43	true
200651_at	GNB2L1 /// SNORD95 /// SNORD96A	guanine nucleotide binding protein (G protein), beta polypeptide 2-like 1 /// small nucleolar RNA, C/D box 95 /// small nucleolar RNA, C/D box 96A	chr5q35.3	0.3183	0.27549	0.35985	13.7631	4.25179e-43	true
206707_x_at	FAM65B	family with sequence similarity 65, member B	chr6p22.3-p21.32	0.31829	0.27548	0.359841	13.7626	4.27945e-43	true
200722_s_at	CAPRIN1	cell cycle associated protein 1	chr11p13	0.318081	0.275265	0.359638	13.7529	4.89375e-43	true
204174_at	ALOX5AP	arachidonate 5-lipoxygenase-activating protein	chr13q12	0.31725	0.27441	0.358833	13.7143	8.33919e-43	true
201688_s_at	TPD52	tumor protein D52	chr8q21	0.317151	0.274308	0.358737	13.7097	8.88264e-43	true
202547_s_at	ARHGEF7	Rho guanine nucleotide exchange factor (GEF) 7	chr13q34	0.31681	0.273958	0.358407	13.6939	1.10454e-42	true
209055_s_at	CDC5L	cell division cycle 5-like	chr6p21	0.316635	0.273778	0.358238	13.6858	1.23482e-42	true
207040_s_at	ST13	suppression of tumorigenicity 13 (colon carcinoma) (Hsp70 interacting protein)	chr22q13.2	0.316409	0.273546	0.358019	13.6753	1.42637e-42	true
205039_s_at	IKZF1	IKAROS family zinc finger 1 (Ikaros)	chr7p13-p11.1	0.316332	0.273467	0.357944	13.6717	1.49796e-42	true
201768_s_at	CLINT1	clathrin interactor 1	chr5q33.3	0.316168	0.273298	0.357785	13.6641	1.66304e-42	true
206126_at	CXCR5	chemokine (C-X-C motif) receptor 5	chr11q23.3	0.315685	0.272801	0.357317	13.6417	2.26134e-42	true
210371_s_at	RBBP4	retinoblastoma binding protein 4	chr1p35.1	0.315399	0.272507	0.35704	13.6284	2.71292e-42	true
35150_at	CD40	CD40 molecule, TNF receptor superfamily member 5	chr20q12-q13.2	0.315373	0.27248	0.357015	13.6272	2.75796e-42	true
205301_s_at	OGG1	8-oxoguanine DNA glycosylase	chr3p26.2	0.314885	0.271978	0.356541	13.6046	3.75951e-42	true
213940_s_at	FNBP1	formin binding protein 1	chr9q34	0.314228	0.271304	0.355906	13.5742	5.69461e-42	true
201946_s_at	CCT2	chaperonin containing TCP1, subunit 2 (beta)	chr12q15	0.314223	0.271298	0.355901	13.574	5.71335e-42	true
219969_at	TXLNG	taxilin gamma	chrXp22.2	0.314183	0.271257	0.355861	13.5721	5.86141e-42	true
218748_s_at	EXOC5	exocyst complex component 5	chr14q22.3	0.313727	0.270788	0.355419	13.551	7.81627e-42	true
214959_s_at	API5	apoptosis inhibitor 5	chr11p11.2	0.313673	0.270733	0.355368	13.5485	8.08366e-42	true
210279_at	GPR18	G protein-coupled receptor 18	chr13q32	0.313635	0.270694	0.355331	13.5468	8.2811e-42	true
217097_s_at	PHTF2	putative homeodomain transcription factor 2	chr7q11.23-q21	0.313635	0.270694	0.355331	13.5467	8.28197e-42	true
201835_s_at	PRKAB1	protein kinase, AMP-activated, beta 1 non-catalytic subunit	chr12q24.1-q24.3	0.313322	0.270372	0.355027	13.5322	1.00889e-41	true
216843_x_at	PMS2P1	postmeiotic segregation increased 2 pseudogene 1	chr7q22.1	0.313061	0.270104	0.354775	13.5202	1.18859e-41	true
210044_s_at	LYL1	lymphoblastic leukemia derived sequence 1	chr19p13.2	0.313036	0.270078	0.35475	13.519	1.20776e-41	true
218561_s_at	LYRM4	LYR motif containing 4	chr6p25.1	0.312627	0.269658	0.354354	13.5001	1.5613e-41	true
218439_s_at	COMMD10	COMM domain containing 10	chr5q23.1	0.312377	0.269401	0.354112	13.4886	1.82649e-41	true
200082_s_at	RPS7	ribosomal protein S7	chr2p25	0.312318	0.26934	0.354054	13.4858	1.8962e-41	true
214544_s_at	SNAP23	synaptosomal-associated protein, 23kDa	chr15q14	0.312071	0.269087	0.353815	13.4744	2.2127e-41	true
218842_at	RPAP3	RNA polymerase II associated protein 3	chr12q13.11	0.311641	0.268644	0.353398	13.4545	2.89702e-41	true
203007_x_at	LYPLA1	lysophospholipase I	chr8q11.23	0.311239	0.268231	0.353008	13.4359	3.72441e-41	true
205961_s_at	PSIP1	PC4 and SFRS1 interacting protein 1	chr9p22.3	0.311121	0.26811	0.352894	13.4305	4.00865e-41	true
205671_s_at	HLA-DOB	major histocompatibility complex, class II, DO beta	chr6p21.3	0.310936	0.26792	0.352715	13.4219	4.49907e-41	true
219073_s_at	OSBPL10	oxysterol binding protein-like 10	chr3p22.3	0.310893	0.267876	0.352673	13.4199	4.62053e-41	true
215990_s_at	BCL6	B-cell CLL/lymphoma 6	chr3q27	0.310731	0.26771	0.352516	13.4125	5.1109e-41	true
221475_s_at	RPL15	ribosomal protein L15	chr3p24.2	0.310022	0.26698	0.351828	13.3797	7.94812e-41	true
209471_s_at	FNTA	farnesyltransferase, CAAX box, alpha	chr8p11	0.309855	0.26681	0.351667	13.372	8.81253e-41	true
218558_s_at	MRPL39	mitochondrial ribosomal protein L39	chr21q21.3	0.309252	0.26619	0.351082	13.3442	1.28101e-40	true
209062_x_at	NCOA3	nuclear receptor coactivator 3	chr20q12	0.308895	0.265823	0.350736	13.3277	1.59751e-40	true
211801_x_at	MFN1	mitofusin 1	chr3q26.33	0.308579	0.265499	0.35043	13.3131	1.94207e-40	true
209579_s_at	MBD4	methyl-CpG binding domain protein 4	chr3q21.3	0.308444	0.26536	0.350299	13.3069	2.11046e-40	true
211020_at	GCNT2	glucosaminyl (N-acetyl) transferase 2, I-branching enzyme (I blood group)	chr6p24.2	0.308127	0.265034	0.349992	13.2923	2.56708e-40	true
216308_x_at	GRHPR	glyoxylate reductase/hydroxypyruvate reductase	chr9q12	0.308017	0.264921	0.349885	13.2872	2.7471e-40	true
216111_x_at	PMS2P3	postmeiotic segregation increased 2 pseudogene 3	chr7q11.23	0.307635	0.264529	0.349515	13.2696	3.47482e-40	true
203819_s_at	IGF2BP3	insulin-like growth factor 2 mRNA binding protein 3	chr7p11	0.307424	0.264312	0.34931	13.2599	3.95619e-40	true
201347_x_at	GRHPR	glyoxylate reductase/hydroxypyruvate reductase	chr9q12	0.306862	0.263735	0.348765	13.234	5.58678e-40	true
203493_s_at	CEP57	centrosomal protein 57kDa	chr11q21	0.30679	0.26366	0.348695	13.2306	5.84058e-40	true
204875_s_at	GMDS	GDP-mannose 4,6-dehydratase	chr6p25	0.306698	0.263566	0.348606	13.2264	6.17698e-40	true
208644_at	PARP1	poly (ADP-ribose) polymerase 1	chr1q41-q42	0.306578	0.263443	0.348489	13.2209	6.6504e-40	true
220999_s_at	CYFIP2	cytoplasmic FMR1 interacting protein 2	chr5q33.3	0.306553	0.263417	0.348465	13.2197	6.75248e-40	true
209080_x_at	GLRX3	glutaredoxin 3	chr10q26	0.306386	0.263245	0.348303	13.212	7.48004e-40	true
210707_x_at	DTX2P1-UPK3BP1-PMS2P11	DTX2P1-UPK3BP1-PMS2P11 readthrough transcribed pseudogene	chr7q11.23	0.306274	0.26313	0.348194	13.2068	8.01113e-40	true
212314_at	SEL1L3	sel-1 suppressor of lin-12-like 3 (C. elegans)	chr4p15.2	0.305983	0.262831	0.347912	13.1934	9.57161e-40	true
201635_s_at	FXR1	fragile X mental retardation, autosomal homolog 1	chr3q28	0.305952	0.2628	0.347883	13.1921	9.74912e-40	true
209704_at	MTF2	metal response element binding transcription factor 2	chr1p22.1	0.305178	0.262005	0.347132	13.1564	1.56346e-39	true
215886_x_at	USP12	ubiquitin specific peptidase 12	chr13q12.13	0.305159	0.261986	0.347114	13.1555	1.58131e-39	true
213461_at	NUDT21	nudix (nucleoside diphosphate linked moiety X)-type motif 21	chr16q12.2	0.305055	0.261878	0.347012	13.1507	1.68557e-39	true
214943_s_at	ARID4B /// RBM34	AT rich interactive domain 4B (RBP1-like) /// RNA binding motif protein 34	chr1q42.1-q43 /// chr1q42.3	0.30487	0.261689	0.346833	13.1422	1.88562e-39	true
213772_s_at	GGA2	golgi-associated, gamma adaptin ear containing, ARF binding protein 2	chr16p12	0.304853	0.261672	0.346817	13.1415	1.90511e-39	true
207079_s_at	MED6	mediator complex subunit 6	chr14q24.2	0.304682	0.261496	0.346651	13.1336	2.11407e-39	true
209142_s_at	UBE2G1	ubiquitin-conjugating enzyme E2G 1	chr17p13.2	0.304645	0.261458	0.346615	13.1319	2.16212e-39	true
201529_s_at	RPA1	replication protein A1, 70kDa	chr17p13.3	0.304545	0.261355	0.346518	13.1273	2.29712e-39	true
203579_s_at	SLC7A6	solute carrier family 7 (amino acid transporter light chain, y+L system), member 6	chr16q22.1	0.304451	0.261258	0.346426	13.1229	2.43331e-39	true
203796_s_at	BCL7A	B-cell CLL/lymphoma 7A	chr12q24.13	0.304353	0.261158	0.346332	13.1185	2.58155e-39	true
53912_at	SNX11	sorting nexin 11	chr17q21.32	0.303061	0.259831	0.345079	13.059	5.6429e-39	true
209629_s_at	NXT2	nuclear transport factor 2-like export factor 2	chrXq23	0.302983	0.259751	0.345003	13.0555	5.91448e-39	true
200679_x_at	HMGB1	high mobility group box 1	chr13q12	0.302923	0.259689	0.344945	13.0527	6.13426e-39	true
203347_s_at	MTF2	metal response element binding transcription factor 2	chr1p22.1	0.302744	0.259506	0.344771	13.0445	6.83248e-39	true
218036_x_at	NMD3	NMD3 homolog (S. cerevisiae)	chr3q26.1	0.302617	0.259375	0.344648	13.0386	7.37771e-39	true
209829_at	FAM65B	family with sequence similarity 65, member B	chr6p22.3-p21.32	0.302463	0.259217	0.344499	13.0316	8.09336e-39	true
216525_x_at	PMS2P3	postmeiotic segregation increased 2 pseudogene 3	chr7q11.23	0.302243	0.258991	0.344285	13.0214	9.24017e-39	true
213594_x_at	LOC100996657 /// SRSF10	serine/arginine-rich splicing factor 10-like /// serine/arginine-rich splicing factor 10	chr1p36.11	0.302239	0.258987	0.344281	13.0213	9.26326e-39	true
200787_s_at	PEA15	phosphoprotein enriched in astrocytes 15	chr1q21.1	0.302103	0.258847	0.344149	13.015	1.00532e-38	true
204207_s_at	RNGTT	RNA guanylyltransferase and 5'-phosphatase	chr6q16	0.302101	0.258845	0.344147	13.0149	1.00636e-38	true
204440_at	CD83	CD83 molecule	chr6p23	0.30209	0.258834	0.344137	13.0144	1.01298e-38	true
214449_s_at	RHOQ	ras homolog family member Q	chr2p21	0.301754	0.258489	0.343811	12.999	1.23975e-38	true
202105_at	IGBP1	immunoglobulin (CD79A) binding protein 1	chrXq13.1-q13.3	0.301551	0.258281	0.343614	12.9897	1.40013e-38	true
212507_at	TMEM131	transmembrane protein 131	chr2q11.2	0.301497	0.258226	0.343562	12.9872	1.44587e-38	true
205321_at	EIF2S3	eukaryotic translation initiation factor 2, subunit 3 gamma, 52kDa	chrXp22.2-p22.1	0.301301	0.258024	0.343371	12.9782	1.62648e-38	true
205174_s_at	QPCT	glutaminyl-peptide cyclotransferase	chr2p22.2	0.301058	0.257775	0.343136	12.9671	1.88119e-38	true
200728_at	ACTR2	ARP2 actin-related protein 2 homolog (yeast)	chr2p14	0.300959	0.257672	0.343039	12.9625	1.99681e-38	true
201151_s_at	MBNL1	muscleblind-like splicing regulator 1	chr3q25	0.300724	0.257432	0.342812	12.9517	2.29726e-38	true
214447_at	ETS1	v-ets erythroblastosis virus E26 oncogene homolog 1 (avian)	chr11q23.3	0.300632	0.257338	0.342723	12.9475	2.42669e-38	true
200023_s_at	EIF3F	eukaryotic translation initiation factor 3, subunit F	chr11p15.4	0.299283	0.255952	0.341413	12.8856	5.42385e-38	true
211967_at	TMEM123	transmembrane protein 123	chr11q22.1	0.298769	0.255425	0.340915	12.8621	7.35759e-38	true
204716_at	CCDC6	coiled-coil domain containing 6	chr10q21	0.298652	0.255305	0.340801	12.8567	7.88482e-38	true
203791_at	DMXL1	Dmx-like 1	chr5q22	0.298152	0.254791	0.340315	12.8338	1.06064e-37	true
213514_s_at	DIAPH1	diaphanous-related formin 1	chr5q31	0.297759	0.254388	0.339934	12.8158	1.33794e-37	true
200978_at	MDH1	malate dehydrogenase 1, NAD (soluble)	chr2p13.3	0.297671	0.254298	0.339849	12.8118	1.40865e-37	true
215785_s_at	CYFIP2	cytoplasmic FMR1 interacting protein 2	chr5q33.3	0.297425	0.254045	0.33961	12.8005	1.62942e-37	true
203302_at	DCK	deoxycytidine kinase	chr4q13.3-q21.1	0.297089	0.2537	0.339284	12.7851	1.98616e-37	true
201998_at	ST6GAL1	ST6 beta-galactosamide alpha-2,6-sialyltranferase 1	chr3q27-q28	0.2969	0.253506	0.3391	12.7765	2.2197e-37	true
216734_s_at	CXCR5	chemokine (C-X-C motif) receptor 5	chr11q23.3	0.296435	0.253029	0.338649	12.7552	2.91726e-37	true
210950_s_at	FDFT1	farnesyl-diphosphate farnesyltransferase 1	chr8p23.1-p22	0.296112	0.252698	0.338336	12.7404	3.52614e-37	true
212644_s_at	MAPK1IP1L	mitogen-activated protein kinase 1 interacting protein 1-like	chr14q22.3	0.295778	0.252356	0.338012	12.7251	4.28731e-37	true
214473_x_at	PMS2P3	postmeiotic segregation increased 2 pseudogene 3	chr7q11.23	0.295694	0.25227	0.33793	12.7213	4.50306e-37	true
213762_x_at	RBMX /// SNORD61	RNA binding motif protein, X-linked /// small nucleolar RNA, C/D box 61	chrXq26.3	0.295626	0.252199	0.337864	12.7182	4.68752e-37	true
208913_at	GGA2	golgi-associated, gamma adaptin ear containing, ARF binding protein 2	chr16p12	0.295304	0.251869	0.337552	12.7035	5.65769e-37	true
217916_s_at	FAM49B	family with sequence similarity 49, member B	chr8q24.21	0.295274	0.251839	0.337523	12.7021	5.75648e-37	true
201721_s_at	LAPTM5	lysosomal protein transmembrane 5	chr1p34	0.295118	0.251678	0.337371	12.6949	6.30837e-37	true
215667_x_at	LOC100132832 /// LOC100996753 /// LOC101060605 /// LOC441259 /// PMS2L2 /// PMS2P1 /// PMS2P5 /// PMS2P6	PMS2 postmeiotic segregation increased 2 (S. cerevisiae) pseudogene /// postmeiotic segregation increased 4-like protein-like /// postmeiotic segregation increased 4-like protein-like /// postmeiotic segregation increased 2 pseudogene /// postmeiotic segregation increased 2-like 2 pseudogene /// postmeiotic segregation increased 2 pseudogene 1 /// postmeiotic segregation increased 2 pseudogene 5 …	chr7q11.23 /// chr7q22.1	0.295005	0.251562	0.337261	12.6898	6.73703e-37	true
214578_s_at	ROCK1	Rho-associated, coiled-coil containing protein kinase 1	chr18q11.1	0.294862	0.251416	0.337123	12.6832	7.32348e-37	true
213101_s_at	ACTR3	ARP3 actin-related protein 3 homolog (yeast)	chr2q14.1	0.294687	0.251236	0.336952	12.6752	8.11178e-37	true
207319_s_at	CDK13	cyclin-dependent kinase 13	chr7p13	0.294537	0.251082	0.336807	12.6684	8.85371e-37	true
211963_s_at	ARPC5	actin related protein 2/3 complex, subunit 5, 16kDa	chr1q25.3	0.293509	0.250027	0.335809	12.6214	1.60898e-36	true
202915_s_at	FAM20B	family with sequence similarity 20, member B	chr1q25	0.293407	0.249923	0.33571	12.6168	1.70668e-36	true
208721_s_at	ANAPC5	anaphase promoting complex subunit 5	chr12q24.31	0.292898	0.249401	0.335216	12.5935	2.29179e-36	true
204936_at	MAP4K2	mitogen-activated protein kinase kinase kinase kinase 2	chr11q13	0.292871	0.249373	0.33519	12.5923	2.32768e-36	true
210188_at	GABPA	GA binding protein transcription factor, alpha subunit 60kDa	chr21q21.3	0.292861	0.249363	0.33518	12.5919	2.34113e-36	true
201559_s_at	CLIC4	chloride intracellular channel 4	chr1p36.11	0.292787	0.249287	0.335108	12.5885	2.4439e-36	true
216733_s_at	GATM	glycine amidinotransferase (L-arginine:glycine amidinotransferase)	chr15q21.1	0.292728	0.249226	0.335051	12.5858	2.52896e-36	true
208309_s_at	MALT1	mucosa associated lymphoid tissue lymphoma translocation gene 1	chr18q21	0.292667	0.249164	0.334992	12.583	2.61939e-36	true
210178_x_at	LOC100996657 /// SRSF10	serine/arginine-rich splicing factor 10-like /// serine/arginine-rich splicing factor 10	chr1p36.11	0.29234	0.248829	0.334674	12.5681	3.16369e-36	true
200927_s_at	RAB14	RAB14, member RAS oncogene family	chr9q32-q34.11	0.291643	0.248114	0.333998	12.5363	4.72744e-36	true
203932_at	HLA-DMB	major histocompatibility complex, class II, DM beta	chr6p21.3	0.291212	0.247672	0.333579	12.5166	6.05635e-36	true
203471_s_at	PLEK	pleckstrin	chr2p13.3	0.291114	0.247571	0.333484	12.5121	6.4071e-36	true
216493_s_at	IGF2BP3	insulin-like growth factor 2 mRNA binding protein 3	chr7p11	0.290609	0.247053	0.332993	12.4891	8.56179e-36	true
201514_s_at	G3BP1	GTPase activating protein (SH3 domain) binding protein 1	chr5q33.1	0.290608	0.247052	0.332992	12.4891	8.56581e-36	true
212107_s_at	DHX9	DEAH (Asp-Glu-Ala-His) box helicase 9	chr1q25	0.290041	0.246471	0.332442	12.4632	1.1847e-35	true
201689_s_at	TPD52	tumor protein D52	chr8q21	0.289946	0.246373	0.33235	12.4589	1.25084e-35	true
200987_x_at	PSME3	proteasome (prosome, macropain) activator subunit 3 (PA28 gamma; Ki)	chr17q21	0.288964	0.245366	0.331395	12.4141	2.19065e-35	true
201456_s_at	BUB3	BUB3 mitotic checkpoint protein	chr10q26	0.288837	0.245236	0.331272	12.4084	2.35426e-35	true
201965_s_at	SETX	senataxin	chr9q34.13	0.288604	0.244997	0.331046	12.3977	2.68782e-35	true
201742_x_at	SRSF1	serine/arginine-rich splicing factor 1	chr17q22	0.288428	0.244816	0.330875	12.3897	2.97045e-35	true
211323_s_at	ITPR1	inositol 1,4,5-trisphosphate receptor, type 1	chr3p26.1	0.288424	0.244812	0.330871	12.3896	2.97668e-35	true
219667_s_at	BANK1	B-cell scaffold protein with ankyrin repeats 1	chr4q24	0.288415	0.244804	0.330863	12.3892	2.99125e-35	true
216060_s_at	DAAM1	dishevelled associated activator of morphogenesis 1	chr14q23.1	0.288201	0.244584	0.330655	12.3794	3.37736e-35	true
208914_at	GGA2	golgi-associated, gamma adaptin ear containing, ARF binding protein 2	chr16p12	0.288117	0.244497	0.330572	12.3756	3.54372e-35	true
204353_s_at	POT1	protection of telomeres 1	chr7q31.33	0.28798	0.244357	0.330439	12.3693	3.82964e-35	true
210947_s_at	MSH3	mutS homolog 3 (E. coli)	chr5q11-q12	0.287806	0.244179	0.330271	12.3614	4.22523e-35	true
222292_at	CD40	CD40 molecule, TNF receptor superfamily member 5	chr20q12-q13.2	0.287701	0.244071	0.330169	12.3567	4.48361e-35	true
203357_s_at	CAPN7	calpain 7	chr3p24	0.287115	0.24347	0.329599	12.33	6.24498e-35	true
201235_s_at	BTG2	BTG family, member 2	chr1q32	0.286624	0.242967	0.329123	12.3077	8.23613e-35	true
218538_s_at	MRS2	MRS2 magnesium transporter	chr6p22.3-p22.1	0.286453	0.242792	0.328957	12.2999	9.06815e-35	true
219633_at	TTPAL	tocopherol (alpha) transfer protein-like	chr20q13.12	0.286421	0.242758	0.328925	12.2984	9.23649e-35	true
214864_s_at	GRHPR	glyoxylate reductase/hydroxypyruvate reductase	chr9q12	0.286389	0.242726	0.328894	12.297	9.40314e-35	true
211871_x_at	GNB5	guanine nucleotide binding protein (G protein), beta 5	chr15q21.2	0.286162	0.242493	0.328674	12.2867	1.06821e-34	true
205443_at	SNAPC1	small nuclear RNA activating complex, polypeptide 1, 43kDa	chr14q22	0.286101	0.242431	0.328615	12.2839	1.10539e-34	true
204004_at	PAWR	PRKC, apoptosis, WT1, regulator	chr12q21	0.285796	0.242118	0.328318	12.27	1.31214e-34	true
216591_s_at	SDHC	succinate dehydrogenase complex, subunit C, integral membrane protein, 15kDa	chr1q23.3	0.285777	0.242098	0.328299	12.2692	1.32637e-34	true
217792_at	SNX5	sorting nexin 5	chr20p11	0.285215	0.241523	0.327754	12.2436	1.81697e-34	true
200009_at	GDI2	GDP dissociation inhibitor 2	chr10p15	0.285066	0.241369	0.327608	12.2368	1.97592e-34	true
206989_s_at	SCAF11	SR-related CTD-associated factor 11	chr12q12	0.284977	0.241278	0.327522	12.2328	2.07675e-34	true
212751_at	UBE2N	ubiquitin-conjugating enzyme E2N	chr12q22	0.284974	0.241276	0.327519	12.2327	2.0797e-34	true
210018_x_at	MALT1	mucosa associated lymphoid tissue lymphoma translocation gene 1	chr18q21	0.28489	0.241189	0.327437	12.2288	2.1802e-34	true
219210_s_at	RAB8B	RAB8B, member RAS oncogene family	chr15q22.2	0.284782	0.241078	0.327333	12.2239	2.31582e-34	true
208697_s_at	EIF3E	eukaryotic translation initiation factor 3, subunit E	chr8q22-q23	0.284777	0.241073	0.327328	12.2237	2.32238e-34	true
209139_s_at	PRKRA	protein kinase, interferon-inducible double stranded RNA dependent activator	chr2q31.2	0.284776	0.241073	0.327327	12.2237	2.32297e-34	true
202129_s_at	RIOK3	RIO kinase 3	chr18q11.2	0.284684	0.240978	0.327237	12.2195	2.44623e-34	true
203491_s_at	CEP57	centrosomal protein 57kDa	chr11q21	0.284207	0.24049	0.326775	12.1979	3.19113e-34	true
202533_s_at	DHFR	dihydrofolate reductase	chr5q11.2-q13.2	0.283674	0.239943	0.326256	12.1736	4.29493e-34	true
216615_s_at	HTR3A	5-hydroxytryptamine (serotonin) receptor 3A, ionotropic	chr11q23.1	0.28367	0.239939	0.326252	12.1735	4.30446e-34	true
209853_s_at	PSME3	proteasome (prosome, macropain) activator subunit 3 (PA28 gamma; Ki)	chr17q21	0.283539	0.239805	0.326125	12.1675	4.62886e-34	true
209954_x_at	SS18	synovial sarcoma translocation, chromosome 18	chr18q11.2	0.28353	0.239795	0.326116	12.1671	4.65289e-34	true
221691_x_at	NPM1	nucleophosmin (nucleolar phosphoprotein B23, numatrin)	chr5q35.1	0.283502	0.239766	0.326089	12.1658	4.72633e-34	true
214526_x_at	PMS2P1	postmeiotic segregation increased 2 pseudogene 1	chr7q22.1	0.283462	0.239726	0.32605	12.164	4.83217e-34	true
210258_at	RGS13	regulator of G-protein signaling 13	chr1q31.2	0.283364	0.239625	0.325955	12.1596	5.10296e-34	true
203056_s_at	PRDM2	PR domain containing 2, with ZNF domain	chr1p36.21	0.283299	0.239558	0.325892	12.1566	5.29067e-34	true
217826_s_at	UBE2J1	ubiquitin-conjugating enzyme E2, J1	chr6q15	0.283101	0.239356	0.325699	12.1476	5.9053e-34	true
211584_s_at	NPAT	nuclear protein, ataxia-telangiectasia locus	chr11q22-q23	0.28282	0.239067	0.325426	12.1349	6.90125e-34	true
205681_at	BCL2A1	BCL2-related protein A1	chr15q24.3	0.282608	0.238851	0.32522	12.1253	7.75947e-34	true
203897_at	LYRM1	LYR motif containing 1	chr16p11.2	0.282462	0.238701	0.325078	12.1187	8.41322e-34	true
211814_s_at	CCNE2	cyclin E2	chr8q22.1	0.282354	0.23859	0.324973	12.1137	8.9334e-34	true
209724_s_at	ZBTB14	zinc finger and BTB domain containing 14	chr18pter-p11.21	0.282069	0.238298	0.324697	12.1008	1.04535e-33	true
217599_s_at	MDFIC	MyoD family inhibitor domain containing	chr7q31.1-q31.2	0.281661	0.23788	0.3243	12.0823	1.30947e-33	true
202118_s_at	CPNE3	copine III	chr8q21.3	0.281564	0.237781	0.324206	12.078	1.38119e-33	true
214639_s_at	HOXA1	homeobox A1	chr7p15.3	0.281398	0.237611	0.324045	12.0704	1.51347e-33	true
212271_at	MAPK1	mitogen-activated protein kinase 1	chr22q11.21	0.28111	0.237315	0.323764	12.0573	1.77429e-33	true
204113_at	CELF1	CUGBP, Elav-like family member 1	chr11p11	0.280943	0.237144	0.323602	12.0498	1.94488e-33	true
208752_x_at	NAP1L1	nucleosome assembly protein 1-like 1	chr12q21.2	0.280906	0.237106	0.323565	12.0481	1.98509e-33	true
202658_at	LOC101060567 /// PEX11B	peroxisomal membrane protein 11B-like /// peroxisomal biogenesis factor 11 beta	chr1q21.1	0.280888	0.237088	0.323548	12.0473	2.00452e-33	true
216080_s_at	FADS3	fatty acid desaturase 3	chr11q12-q13.1	0.280787	0.236984	0.32345	12.0427	2.1191e-33	true
218534_s_at	AGGF1	angiogenic factor with G patch and FHA domains 1	chr5q13.3	0.279904	0.236079	0.322592	12.0027	3.43897e-33	true
217547_x_at	ZNF675	zinc finger protein 675	chr19p12	0.279809	0.235982	0.322499	11.9984	3.62232e-33	true
212835_at	FAM175B	family with sequence similarity 175, member B	chr10q26.13	0.279778	0.235951	0.32247	11.997	3.68333e-33	true
221092_at	IKZF3	IKAROS family zinc finger 3 (Aiolos)	chr17q21	0.279738	0.235909	0.32243	11.9952	3.76554e-33	true
200012_x_at	RPL21 /// RPL21P28 /// SNORA27 /// SNORD102	ribosomal protein L21 /// ribosomal protein L21 pseudogene 28 /// small nucleolar RNA, H/ACA box 27 /// small nucleolar RNA, C/D box 102	chr13q12.2 /// chr1q32.3	0.279659	0.235829	0.322354	11.9916	3.93087e-33	true
215925_s_at	CD72	CD72 molecule	chr9p13.3	0.279457	0.235622	0.322157	11.9825	4.39e-33	true
204319_s_at	RGS10	regulator of G-protein signaling 10	chr10q25	0.279386	0.235549	0.322088	11.9793	4.56376e-33	true
200034_s_at	RPL6	ribosomal protein L6	chr12q24.1	0.279338	0.235499	0.322041	11.9771	4.6857e-33	true
202495_at	TBCC	tubulin folding cofactor C	chr6p21.1	0.279299	0.23546	0.322004	11.9753	4.78549e-33	true
200937_s_at	RPL5 /// SNORD21	ribosomal protein L5 /// small nucleolar RNA, C/D box 21	chr1p22.1	0.279207	0.235365	0.321914	11.9711	5.03331e-33	true
209620_s_at	ABCB7	ATP-binding cassette, sub-family B (MDR/TAP), member 7	chrXq13.3	0.279126	0.235282	0.321835	11.9675	5.26022e-33	true
50221_at	TFEB	transcription factor EB	chr6p21	0.278892	0.235043	0.321609	11.9569	5.9735e-33	true
202900_s_at	NUP88	nucleoporin 88kDa	chr17p13.2	0.278866	0.235016	0.321583	11.9557	6.06067e-33	true
203555_at	PTPN18	protein tyrosine phosphatase, non-receptor type 18 (brain-derived)	chr2q21.1	0.278603	0.234747	0.321327	11.9438	6.99361e-33	true
203820_s_at	IGF2BP3	insulin-like growth factor 2 mRNA binding protein 3	chr7p11	0.278262	0.234398	0.320996	11.9284	8.41789e-33	true
214336_s_at	COPA	coatomer protein complex, subunit alpha	chr1q23.2	0.278185	0.234319	0.320921	11.9249	8.77646e-33	true
205668_at	LY75	lymphocyte antigen 75	chr2q24	0.277995	0.234124	0.320736	11.9163	9.73283e-33	true
215157_x_at	PABPC1	poly(A) binding protein, cytoplasmic 1	chr8q22.2-q23	0.277926	0.234054	0.320669	11.9132	1.0101e-32	true
204960_at	PTPRCAP	protein tyrosine phosphatase, receptor type, C-associated protein	chr11q13.3	0.277739	0.233862	0.320488	11.9048	1.11782e-32	true
216242_x_at	POLR2J2 /// POLR2J3 /// POLR2J4 /// UPK3BL	polymerase (RNA) II (DNA directed) polypeptide J2 /// polymerase (RNA) II (DNA directed) polypeptide J3 /// polymerase (RNA) II (DNA directed) polypeptide J4, pseudogene /// uroplakin 3B-like	chr7p13 /// chr7q22.1	0.277636	0.233756	0.320387	11.9001	1.18238e-32	true
203284_s_at	HS2ST1	heparan sulfate 2-O-sulfotransferase 1	chr1p22.3	0.277516	0.233633	0.32027	11.8946	1.26187e-32	true
204923_at	SASH3	SAM and SH3 domain containing 3	chrXq26	0.277502	0.233619	0.320257	11.894	1.27145e-32	true
203026_at	ZBTB5	zinc finger and BTB domain containing 5	chr9p13.2	0.277473	0.23359	0.320229	11.8927	1.29123e-32	true
204833_at	ATG12	autophagy related 12	chr5q21-q22	0.276791	0.232891	0.319566	11.8619	1.86714e-32	true
210802_s_at	DIMT1	DIM1 dimethyladenosine transferase 1 homolog (S. cerevisiae)	chr5q12.1	0.276711	0.232809	0.319487	11.8583	1.94999e-32	true
211672_s_at	ARPC4	actin related protein 2/3 complex, subunit 4, 20kDa	chr3p25.3	0.276648	0.232744	0.319426	11.8554	2.01754e-32	true
200024_at	RPS5	ribosomal protein S5	chr19q13.4	0.276613	0.232708	0.319392	11.8538	2.05596e-32	true
210092_at	MAGOH	mago-nashi homolog, proliferation-associated (Drosophila)	chr1p32.3	0.276453	0.232545	0.319237	11.8466	2.24073e-32	true
213995_at	ATP5S	ATP synthase, H+ transporting, mitochondrial Fo complex, subunit s (factor B)	chr14q21.3	0.276341	0.23243	0.319128	11.8415	2.38039e-32	true
202899_s_at	SRSF3	serine/arginine-rich splicing factor 3	chr6p21	0.276109	0.232193	0.318902	11.8311	2.69694e-32	true
212145_at	MRPS27	mitochondrial ribosomal protein S27	chr5q13.2	0.276024	0.232106	0.31882	11.8272	2.82308e-32	true
213160_at	DOCK2	dedicator of cytokinesis 2	chr5q35.1	0.27597	0.23205	0.318767	11.8248	2.90684e-32	true
200846_s_at	PPP1CA	protein phosphatase 1, catalytic subunit, alpha isozyme	chr11q13	0.275943	0.232022	0.31874	11.8235	2.94977e-32	true
203494_s_at	CEP57	centrosomal protein 57kDa	chr11q21	0.275712	0.231786	0.318516	11.8131	3.33889e-32	true
218185_s_at	ARMC1	armadillo repeat containing 1	chr8q13.1	0.275638	0.23171	0.318444	11.8098	3.47528e-32	true
220477_s_at	TMEM230	transmembrane protein 230	chr20p13	0.275607	0.231678	0.318414	11.8084	3.53354e-32	true
210450_at	IGHV5-78	immunoglobulin heavy variable 5-78 (pseudogene)	chr14q32.33	0.274994	0.231051	0.317818	11.7807	4.90748e-32	true
221881_s_at	CLIC4	chloride intracellular channel 4	chr1p36.11	0.274812	0.230864	0.317641	11.7725	5.41177e-32	true
203885_at	RAB21	RAB21, member RAS oncogene family	chr12q21.1	0.274709	0.230758	0.317541	11.7678	5.71795e-32	true
218318_s_at	NLK	nemo-like kinase	chr17q11.2	0.274672	0.230721	0.317505	11.7662	5.83175e-32	true
204234_s_at	ZNF195	zinc finger protein 195	chr11p15.5	0.274646	0.230695	0.31748	11.765	5.9122e-32	true
200705_s_at	EEF1B2 /// SNORA41	eukaryotic translation elongation factor 1 beta 2 /// small nucleolar RNA, H/ACA box 41	chr2q33 /// chr2q33.3	0.274645	0.230693	0.317479	11.765	5.91593e-32	true
202626_s_at	LYN	v-yes-1 Yamaguchi sarcoma viral related oncogene homolog	chr8q13	0.274403	0.230445	0.317243	11.754	6.7331e-32	true
214756_x_at	PMS2P1	postmeiotic segregation increased 2 pseudogene 1	chr7q22.1	0.274059	0.230093	0.316909	11.7385	8.09038e-32	true
218935_at	EHD3	EH-domain containing 3	chr2p21	0.274015	0.230048	0.316866	11.7365	8.28476e-32	true
202697_at	NUDT21	nudix (nucleoside diphosphate linked moiety X)-type motif 21	chr16q12.2	0.273949	0.229981	0.316802	11.7335	8.57853e-32	true
211849_s_at	RNGTT	RNA guanylyltransferase and 5'-phosphatase	chr6q16	0.273856	0.229885	0.316711	11.7293	9.01601e-32	true
203611_at	TERF2	telomeric repeat binding factor 2	chr16q22.1	0.273813	0.229841	0.316669	11.7274	9.22628e-32	true
220946_s_at	SETD2	SET domain containing 2	chr3p21.31	0.27375	0.229777	0.316608	11.7246	9.54001e-32	true
201922_at	NSA2	NSA2 ribosome biogenesis homolog (S. cerevisiae)	chr5q13.3	0.273718	0.229743	0.316577	11.7231	9.7068e-32	true
201209_at	HDAC1	histone deacetylase 1	chr1p34	0.27367	0.229694	0.31653	11.7209	9.95834e-32	true
211937_at	EIF4B	eukaryotic translation initiation factor 4B	chr12q13.13	0.273413	0.229432	0.31628	11.7094	1.14145e-31	true
207419_s_at	RAC2	ras-related C3 botulinum toxin substrate 2 (rho family, small GTP binding protein Rac2)	chr22q13.1	0.273337	0.229354	0.316206	11.7059	1.1886e-31	true
220674_at	CD22	CD22 molecule	chr19q13.1	0.273235	0.229249	0.316107	11.7013	1.25508e-31	true
208622_s_at	EZR	ezrin	chr6q25.3	0.273161	0.229174	0.316035	11.698	1.30523e-31	true
206238_s_at	YAF2	YY1 associated factor 2	chr12q12	0.273103	0.229114	0.315979	11.6954	1.34598e-31	true
203252_at	CDK2AP2	cyclin-dependent kinase 2 associated protein 2	chr11q13	0.273014	0.229023	0.315892	11.6913	1.41146e-31	true
211540_s_at	RB1	retinoblastoma 1	chr13q14.2	0.272879	0.228884	0.31576	11.6852	1.51642e-31	true
215286_s_at	PHTF2	putative homeodomain transcription factor 2	chr7q11.23-q21	0.272605	0.228605	0.315495	11.6729	1.75286e-31	true
200644_at	MARCKSL1	MARCKS-like 1	chr1p35.1	0.272482	0.228479	0.315375	11.6674	1.87119e-31	true
212415_at	SEPT6	septin 6	chrXq24	0.272423	0.228418	0.315318	11.6647	1.93051e-31	true
203582_s_at	RAB4A /// SPHAR	RAB4A, member RAS oncogene family /// S-phase response (cyclin related)	chr1q42-q43 /// chr1q42.13	0.272358	0.228351	0.315254	11.6618	1.99871e-31	true
210465_s_at	SNAPC3	small nuclear RNA activating complex, polypeptide 3, 50kDa	chr9p22.3	0.272186	0.228175	0.315087	11.654	2.18891e-31	true
218163_at	MCTS1	malignant T cell amplified sequence 1	chrXq24	0.272065	0.228051	0.314969	11.6486	2.33351e-31	true
206255_at	BLK	B lymphoid tyrosine kinase	chr8p23-p22	0.271921	0.227904	0.314829	11.6421	2.51836e-31	true
208351_s_at	MAPK1	mitogen-activated protein kinase 1	chr22q11.21	0.271813	0.227794	0.314724	11.6372	2.66551e-31	true
218283_at	SS18L2	synovial sarcoma translocation gene on chromosome 18-like 2	chr3p21	0.271808	0.227789	0.314719	11.637	2.67265e-31	true
212105_s_at	DHX9	DEAH (Asp-Glu-Ala-His) box helicase 9	chr1q25	0.271624	0.2276	0.31454	11.6287	2.94601e-31	true
211015_s_at	HSPA4	heat shock 70kDa protein 4	chr5q31.1	0.271574	0.227549	0.314492	11.6264	3.02429e-31	true
202911_at	MSH6	mutS homolog 6 (E. coli)	chr2p16	0.271548	0.227522	0.314466	11.6253	3.06629e-31	true
211537_x_at	MAP3K7	mitogen-activated protein kinase kinase kinase 7	chr6q15	0.271545	0.227519	0.314463	11.6251	3.07077e-31	true
209876_at	GIT2	G protein-coupled receptor kinase interacting ArfGAP 2	chr12q24.1	0.271444	0.227415	0.314365	11.6206	3.2399e-31	true
200029_at	RPL19	ribosomal protein L19	chr17q12	0.271215	0.227182	0.314142	11.6103	3.65424e-31	true
201856_s_at	ZFR	zinc finger RNA binding protein	chr5p13.3	0.271047	0.227009	0.313978	11.6027	3.9939e-31	true
211423_s_at	SC5D	sterol-C5-desaturase	chr11q23.3	0.270781	0.226737	0.313719	11.5907	4.59395e-31	true
204689_at	HHEX	hematopoietically expressed homeobox	chr10q23.33	0.270472	0.22642	0.313419	11.5768	5.40417e-31	true
217002_s_at	HTR3A	5-hydroxytryptamine (serotonin) receptor 3A, ionotropic	chr11q23.1	0.27027	0.226214	0.313223	11.5677	6.00673e-31	true
201592_at	EIF3H	eukaryotic translation initiation factor 3, subunit H	chr8q24.11	0.270017	0.225955	0.312977	11.5563	6.85911e-31	true
200010_at	RPL11	ribosomal protein L11	chr1p36.1-p35	0.269927	0.225863	0.312889	11.5523	7.19119e-31	true
211117_x_at	ESR2	estrogen receptor 2 (ER beta)	chr14q23.2	0.26968	0.22561	0.312649	11.5411	8.18302e-31	true
203816_at	DGUOK	deoxyguanosine kinase	chr2p13	0.269594	0.225522	0.312565	11.5373	8.56036e-31	true
211825_s_at	FLI1	Friend leukemia virus integration 1	chr11q24.1-q24.3	0.269336	0.225258	0.312314	11.5257	9.79581e-31	true
215412_x_at	LOC100132832 /// PMS2L2 /// PMS2P5	PMS2 postmeiotic segregation increased 2 (S. cerevisiae) pseudogene /// postmeiotic segregation increased 2-like 2 pseudogene /// postmeiotic segregation increased 2 pseudogene 5	chr7q11.23	0.269151	0.225069	0.312134	11.5173	1.07893e-30	true
213687_s_at	RPL35A	ribosomal protein L35a	chr3q29	0.269097	0.225013	0.312082	11.5149	1.10976e-30	true
203214_x_at	CDK1	cyclin-dependent kinase 1	chr10q21.1	0.268961	0.224875	0.311949	11.5088	1.19124e-30	true
220368_s_at	SMEK1	SMEK homolog 1, suppressor of mek1 (Dictyostelium)	chr14q32.12	0.268741	0.224649	0.311735	11.4989	1.33602e-30	true
216901_s_at	IKZF1	IKAROS family zinc finger 1 (Ikaros)	chr7p13-p11.1	0.268684	0.224591	0.311679	11.4963	1.37658e-30	true
213893_x_at	LOC100132832 /// PMS2P5	PMS2 postmeiotic segregation increased 2 (S. cerevisiae) pseudogene /// postmeiotic segregation increased 2 pseudogene 5	chr7q11.23	0.268486	0.224388	0.311487	11.4874	1.52602e-30	true
206348_s_at	PDK3	pyruvate dehydrogenase kinase, isozyme 3	chrXp22.11	0.268437	0.224337	0.311439	11.4852	1.5659e-30	true
200943_at	HMGN1	high mobility group nucleosome binding domain 1	chr21q22.2	0.268402	0.224302	0.311405	11.4837	1.59401e-30	true
221703_at	BRIP1	BRCA1 interacting protein C-terminal helicase 1	chr17q22.2	0.268085	0.223978	0.311097	11.4694	1.87978e-30	true
201711_x_at	RANBP2	RAN binding protein 2	chr2q12.3	0.267909	0.223798	0.310925	11.4615	2.05992e-30	true
209083_at	CORO1A	coronin, actin binding protein, 1A	chr16p11.2	0.267889	0.223777	0.310905	11.4605	2.08189e-30	true
211118_x_at	ESR2	estrogen receptor 2 (ER beta)	chr14q23.2	0.267587	0.223468	0.310612	11.447	2.43456e-30	true
212720_at	PAPOLA	poly(A) polymerase alpha	chr14q32.31	0.26755	0.22343	0.310576	11.4453	2.4816e-30	true
202019_s_at	LANCL1	LanC lantibiotic synthetase component C-like 1 (bacterial)	chr2q33-q35	0.267464	0.223342	0.310492	11.4415	2.5945e-30	true
206113_s_at	RAB5A	RAB5A, member RAS oncogene family	chr3p24-p22	0.267301	0.223175	0.310333	11.4341	2.82374e-30	true
200806_s_at	HSPD1	heat shock 60kDa protein 1 (chaperonin)	chr2q33.1	0.26723	0.223102	0.310264	11.4309	2.92946e-30	true
209141_at	UBE2G1	ubiquitin-conjugating enzyme E2G 1	chr17p13.2	0.267196	0.223067	0.310231	11.4294	2.98205e-30	true
212782_x_at	POLR2J	polymerase (RNA) II (DNA directed) polypeptide J, 13.3kDa	chr7q22.1	0.267186	0.223057	0.310221	11.4289	2.99722e-30	true
210667_s_at	C21orf33	chromosome 21 open reading frame 33	chr21q22.3	0.26707	0.222939	0.310109	11.4238	3.18178e-30	true
217939_s_at	AFTPH	aftiphilin	chr2p14	0.266989	0.222855	0.310029	11.4201	3.31912e-30	true
204529_s_at	TOX	thymocyte selection-associated high mobility group box	chr8q12.1	0.266778	0.22264	0.309824	11.4106	3.70122e-30	true
208744_x_at	HSPH1	heat shock 105kDa/110kDa protein 1	chr13q12.3	0.266758	0.222619	0.309805	11.4097	3.73952e-30	true
215708_s_at	LOC100996481 /// PRIM2	DNA primase large subunit-like /// primase, DNA, polypeptide 2 (58kDa)	chr6p12-p11.1	0.266614	0.222472	0.309665	11.4033	4.02773e-30	true
218438_s_at	MED28	mediator complex subunit 28	chr4p16	0.266404	0.222257	0.309461	11.3938	4.48864e-30	true
202300_at	LAMTOR5	late endosomal/lysosomal adaptor, MAPK and MTOR activator 5	chr1p13.3	0.266081	0.221927	0.309147	11.3793	5.30051e-30	true
213465_s_at	PPP1R7	protein phosphatase 1, regulatory subunit 7	chr2q37.3	0.265955	0.221798	0.309023	11.3736	5.65737e-30	true
200858_s_at	RPS8 /// SNORD38B /// SNORD55	ribosomal protein S8 /// small nucleolar RNA, C/D box 38B /// small nucleolar RNA, C/D box 55	chr1p34.1 /// chr1p34.1-p32	0.26581	0.221649	0.308882	11.3671	6.09676e-30	true
202164_s_at	CNOT8	CCR4-NOT transcription complex, subunit 8	chr5q31-q33	0.265605	0.22144	0.308683	11.3579	6.7716e-30	true
219978_s_at	NUSAP1	nucleolar and spindle associated protein 1	chr15q15.1	0.265604	0.221439	0.308682	11.3579	6.7755e-30	true
219015_s_at	ALG13	ALG13, UDP-N-acetylglucosaminyltransferase subunit	chrXq23	0.265519	0.221352	0.308599	11.3541	7.07778e-30	true
208736_at	ARPC3	actin related protein 2/3 complex, subunit 3, 21kDa	chr12q24.11	0.265452	0.221284	0.308534	11.3511	7.32593e-30	true
219119_at	NAA38	N(alpha)-acetyltransferase 38, NatC auxiliary subunit	chr7q31.1-q31.3	0.26545	0.221281	0.308532	11.351	7.33363e-30	true
209650_s_at	TBC1D22A	TBC1 domain family, member 22A	chr22q13.3	0.265438	0.221269	0.308521	11.3505	7.37768e-30	true
220140_s_at	SNX11	sorting nexin 11	chr17q21.32	0.26532	0.221148	0.308406	11.3451	7.83953e-30	true
217768_at	C14orf166	chromosome 14 open reading frame 166	chr14q22.1	0.265228	0.221054	0.308316	11.341	8.21893e-30	true
215082_at	ELOVL5	ELOVL fatty acid elongase 5	chr6p21.1-p12.1	0.265067	0.22089	0.308159	11.3338	8.92614e-30	true
206586_at	CNR2	cannabinoid receptor 2 (macrophage)	chr1p36.11	0.264846	0.220664	0.307944	11.3239	9.99521e-30	true
201899_s_at	UBE2A	ubiquitin-conjugating enzyme E2A	chrXq24	0.264635	0.220447	0.307738	11.3144	1.11395e-29	true
209861_s_at	METAP2	methionyl aminopeptidase 2	chr12q22	0.264628	0.22044	0.307732	11.3141	1.11778e-29	true
214552_s_at	RABEP1	rabaptin, RAB GTPase binding effector protein 1	chr17p13.2	0.264492	0.220301	0.307599	11.308	1.19845e-29	true
203202_at	KRR1	KRR1, small subunit (SSU) processome component, homolog (yeast)	chr12q21.2	0.264248	0.220052	0.307362	11.297	1.35712e-29	true
201830_s_at	NET1	neuroepithelial cell transforming 1	chr10p15	0.264234	0.220037	0.307348	11.2964	1.36713e-29	true
214786_at	MAP3K1	mitogen-activated protein kinase kinase kinase 1, E3 ubiquitin protein ligase	chr5q11.2	0.264173	0.219975	0.307289	11.2937	1.41049e-29	true
218119_at	TIMM23 /// TIMM23B	translocase of inner mitochondrial membrane 23 homolog (yeast) /// translocase of inner mitochondrial membrane 23 homolog B (yeast)	chr10q11.23	0.263992	0.219789	0.307112	11.2855	1.54736e-29	true
221258_s_at	KIF18A	kinesin family member 18A	chr11p14.1	0.263942	0.219739	0.307064	11.2833	1.58689e-29	true
201343_at	UBE2D2	ubiquitin-conjugating enzyme E2D 2	chr5q31.2	0.26389	0.219685	0.307013	11.281	1.62975e-29	true
217485_x_at	PMS2P1	postmeiotic segregation increased 2 pseudogene 1	chr7q22.1	0.263795	0.219588	0.30692	11.2767	1.7109e-29	true
209095_at	DLD	dihydrolipoamide dehydrogenase	chr7q31-q32	0.263704	0.219495	0.306832	11.2726	1.79163e-29	true
205922_at	VNN2	vanin 2	chr6q23-q24	0.263545	0.219332	0.306677	11.2655	1.94306e-29	true
205071_x_at	XRCC4	X-ray repair complementing defective repair in Chinese hamster cells 4	chr5q14.2	0.263361	0.219144	0.306498	11.2572	2.1336e-29	true
213047_x_at	SET	SET nuclear oncogene	chr9q34	0.263338	0.219121	0.306476	11.2562	2.15869e-29	true
209898_x_at	ITSN2	intersectin 2	chr2pter-p25.1	0.262987	0.218762	0.306135	11.2405	2.57972e-29	true
212168_at	RBM12	RNA binding motif protein 12	chr20q11.21	0.262969	0.218744	0.306117	11.2397	2.60353e-29	true
201898_s_at	UBE2A	ubiquitin-conjugating enzyme E2A	chrXq24	0.262938	0.218711	0.306086	11.2383	2.6457e-29	true
203978_at	NUBP1	nucleotide binding protein 1	chr16p13.13	0.262916	0.218689	0.306065	11.2373	2.67559e-29	true
203013_at	ECD	ecdysoneless homolog (Drosophila)	chr10q22.3	0.26272	0.218488	0.305874	11.2285	2.95499e-29	true
215239_x_at	ZNF273	zinc finger protein 273	chr7q11.21	0.262705	0.218473	0.305859	11.2278	2.97811e-29	true
201784_s_at	C11orf58	chromosome 11 open reading frame 58	chr11p15.1	0.2627	0.218468	0.305855	11.2276	2.9848e-29	true
202817_s_at	SS18	synovial sarcoma translocation, chromosome 18	chr18q11.2	0.262659	0.218426	0.305815	11.2257	3.04826e-29	true
76897_s_at	FKBP15	FK506 binding protein 15, 133kDa	chr9q32	0.262546	0.218311	0.305705	11.2207	3.22681e-29	true
213414_s_at	RPS19	ribosomal protein S19	chr19q13.2	0.262215	0.217972	0.305383	11.2059	3.81651e-29	true
220068_at	VPREB3	pre-B lymphocyte 3	chr22q11.23|22q11	0.261952	0.217703	0.305127	11.1941	4.35883e-29	true
204128_s_at	RFC3	replication factor C (activator 1) 3, 38kDa	chr13q13.2	0.261818	0.217566	0.304996	11.1881	4.6657e-29	true
219493_at	SHCBP1	SHC SH2-domain binding protein 1	chr16q11.2	0.261799	0.217547	0.304978	11.1872	4.70983e-29	true
209672_s_at	MIOS	missing oocyte, meiosis regulator, homolog (Drosophila)	chr7p21.3	0.261437	0.217176	0.304625	11.171	5.6547e-29	true
217496_s_at	IDE	insulin-degrading enzyme	chr10q23-q25	0.26135	0.217088	0.304541	11.1671	5.90742e-29	true
202753_at	PSMD6	proteasome (prosome, macropain) 26S subunit, non-ATPase, 6	chr3p14.1	0.261333	0.21707	0.304524	11.1663	5.95876e-29	true
221765_at	UGCG	UDP-glucose ceramide glucosyltransferase	chr9q31	0.261027	0.216757	0.304226	11.1526	6.95285e-29	true
200823_x_at	RPL29	ribosomal protein L29	chr3p21.3-p21.2	0.260893	0.216619	0.304095	11.1466	7.43919e-29	true
207223_s_at	PTBP3	polypyrimidine tract binding protein 3	chr9q32	0.260783	0.216507	0.303988	11.1417	7.86067e-29	true
212560_at	SORL1	sortilin-related receptor, L(DLR class) A repeats containing	chr11q23.2-q24.2	0.260765	0.216489	0.303971	11.1409	7.93124e-29	true
201528_at	RPA1	replication protein A1, 70kDa	chr17p13.3	0.260461	0.216178	0.303674	11.1273	9.24358e-29	true
217887_s_at	EPS15	epidermal growth factor receptor pathway substrate 15	chr1p32	0.260458	0.216175	0.303672	11.1272	9.25452e-29	true
209061_at	NCOA3	nuclear receptor coactivator 3	chr20q12	0.260301	0.216014	0.303518	11.1201	1.00169e-28	true
211666_x_at	RNU86 /// RPL3 /// SNORD83B	RNA, U86 small nucleolar /// ribosomal protein L3 /// small nucleolar RNA, C/D box 83B	chr22q13	0.26007	0.215778	0.303294	11.1098	1.12445e-28	true
208739_x_at	SUMO2	small ubiquitin-like modifier 2	chr17q25.1	0.259979	0.215685	0.303205	11.1057	1.17678e-28	true
204615_x_at	IDI1	isopentenyl-diphosphate delta isomerase 1	chr10p15.3	0.259853	0.215556	0.303082	11.1	1.25379e-28	true
212497_at	MAPK1IP1L	mitogen-activated protein kinase 1 interacting protein 1-like	chr14q22.3	0.25981	0.215513	0.303041	11.0981	1.28069e-28	true
219080_s_at	CTPS2	CTP synthase 2	chrXp22	0.259808	0.21551	0.303038	11.098	1.28248e-28	true
201632_at	EIF2B1	eukaryotic translation initiation factor 2B, subunit 1 alpha, 26kDa	chr12q24.31	0.259527	0.215223	0.302765	11.0855	1.47582e-28	true
210559_s_at	CDK1	cyclin-dependent kinase 1	chr10q21.1	0.259411	0.215104	0.302652	11.0803	1.56407e-28	true
